# Supplementary material
Source: PubMed Central journal article supplement (PMC428458)

wild type

IRF-4<sup>-/-</sup>

A

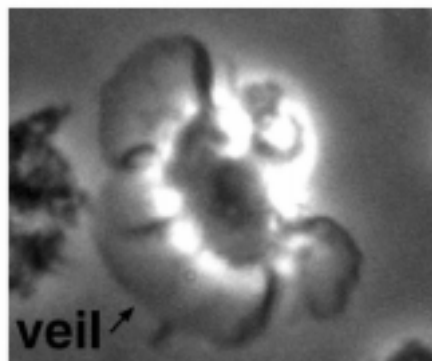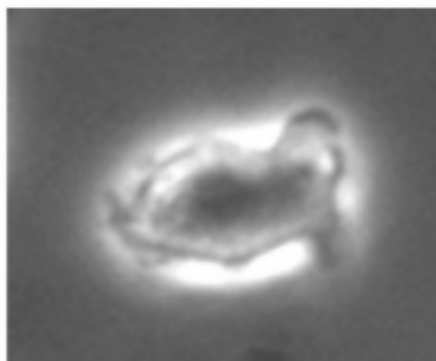

B

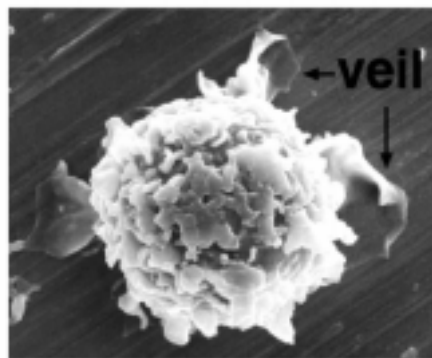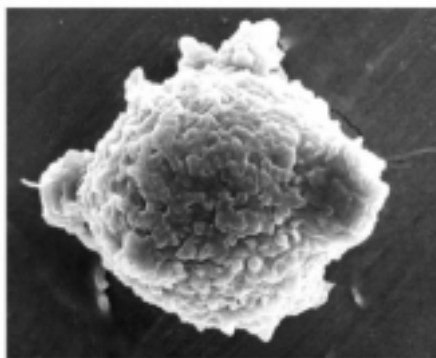

Supplement: pnas_101_24_8981__2.pdf [file pnas_101_24_8981__2.pdf]

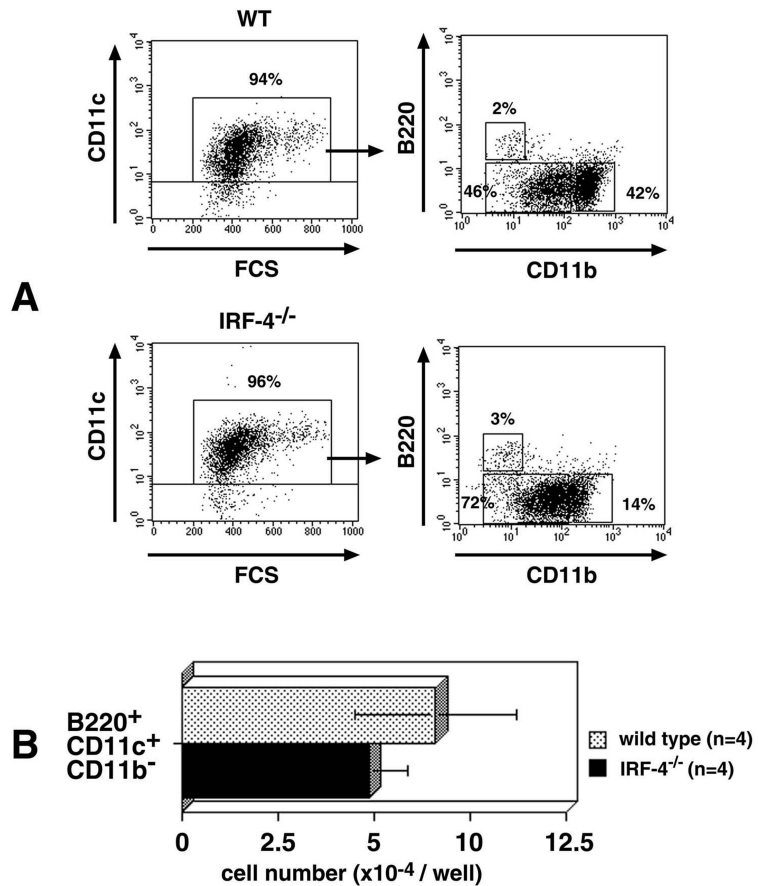

Supplement: pnas_101_24_8981__3.pdf [file pnas_101_24_8981__3.pdf]
